# Supplementary material for: A Comparative Analysis between Whole Chinese Yam and Peeled Chinese Yam: Their Hypolipidemic Effects via Modulation of Gut Microbiome in High-Fat Diet-Fed Mice
Source: MDPI journal article supplement (doi:10.3390/nu16070977), 2024-03-27
Supplement: s1 [file s1]

Table S1 Proximate nutritional composition of Chinese yam (g/100g dry weight basis)

| Component               | WY                        | PY                        |
|-------------------------|---------------------------|---------------------------|
| Carbohydrate            | 72.25 ± 0.32 <sup>a</sup> | 74.50 ± 0.26 <sup>a</sup> |
| Protein                 | 13.85 ± 0.06 <sup>a</sup> | 13.57 ± 0.10 <sup>a</sup> |
| Total dietary fiber     | 7.75 ± 0.07 <sup>a</sup>  | 6.28 ± 0.05 <sup>b</sup>  |
| Insoluble dietary fiber | 7.05 ± 0.05 <sup>a</sup>  | 6.24 ± 0.02 <sup>b</sup>  |
| Soluble dietary fiber   | 0.70 ± 0.03 <sup>a</sup>  | 0.36 ± 0.03 <sup>b</sup>  |
| Fat                     | 1.47 ± 0.01 <sup>a</sup>  | 1.49 ± 0.03 <sup>a</sup>  |
| Ash                     | 4.67 ± 0.04 <sup>a</sup>  | 4.15 ± 0.05 <sup>a</sup>  |

Means with different small letter superscripts in the same column are significantly different at  $p < 0.05$ . The letter “a” denotes the highest value.

Table S2 Composition of experimental diets <sup>1</sup>

| Ingredient (g/kg)                     | NCD    | HFD    | Yam-based diets |        |
|---------------------------------------|--------|--------|-----------------|--------|
|                                       |        |        | HFD-WY          | HFD-PY |
| Whole Chinese yam                     | 0.00   | 0.00   | 250.00          | 0.00   |
| Peeled Chinese yam                    | 0.00   | 0.00   | 0.00            | 250.00 |
| Casein, 80 Mesh                       | 189.56 | 258.45 | 223.83          | 224.52 |
| L-Cystine                             | 2.84   | 3.88   | 3.88            | 3.88   |
| Corn Starch                           | 479.79 | 0.00   | 0.00            | 0.00   |
| Maltodextrin 10                       | 118.48 | 161.53 | 0.00            | 0.00   |
| Sucrose                               | 65.21  | 88.91  | 58.13           | 53.82  |
| Cellulose, BW200                      | 47.39  | 64.61  | 45.24           | 48.91  |
| Soybean Oil                           | 23.70  | 32.31  | 28.63           | 28.59  |
| Lard                                  | 18.96  | 316.60 | 316.60          | 316.60 |
| Mineral Mix                           | 9.48   | 12.92  | 12.92           | 12.92  |
| DiCalcium Phosphate                   | 12.32  | 16.80  | 16.80           | 16.80  |
| Calcium Carbonate                     | 5.21   | 7.11   | 7.11            | 7.11   |
| Potassium Citrate, 1 H <sub>2</sub> O | 15.64  | 21.32  | 21.32           | 21.32  |
| Vitamin Mix, V10001                   | 9.48   | 12.92  | 12.92           | 12.92  |
| Choline Bitartrate                    | 1.90   | 2.58   | 2.58            | 2.58   |
| FD&C Yellow Dye #5                    | 0.04   | 0.00   | 0.00            | 0.00   |
| FD&C Blue Dye #1                      | 0.01   | 0.07   | 0.07            | 0.07   |
| Total                                 | 1000   | 1000   | 1000            | 1000   |
| % Energy and their source             |        |        |                 |        |
| Protein                               | 20     | 20     | 20              | 20     |
| Carbohydrate                          | 70     | 20     | 20              | 20     |
| Fat                                   | 10     | 60     | 60              | 60     |
| Total                                 | 100    | 100    | 100             | 100    |

<sup>1</sup> To equalize the carbohydrate, protein, fat, sucrose and fiber content (g/kg diet) of the HFD, HFD-WY, and HFD-PY, the maltodextrin, casein, soybean oil, sucrose, and cellulose were reduced in the HFD-WY and HFD-PY diets, respectively.

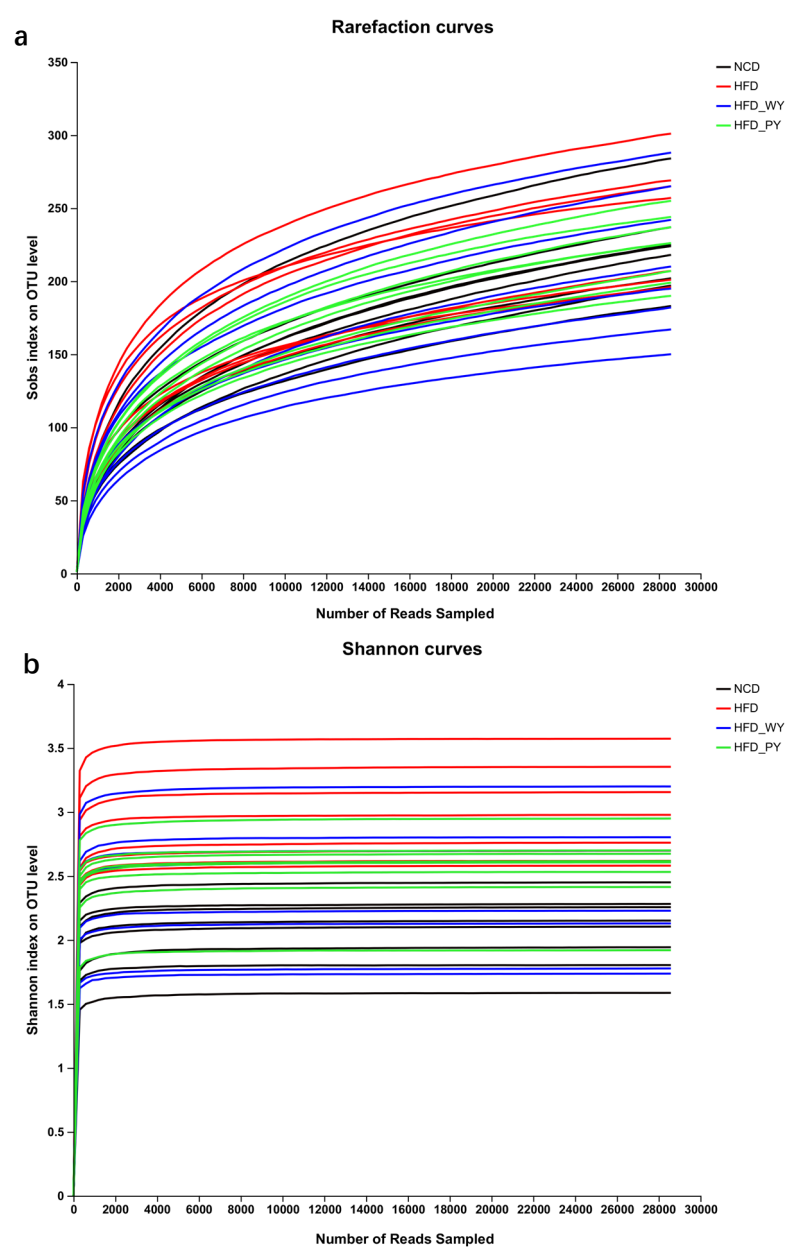

**Figure S1** Alpha diversity analysis of samples by Rarefaction analysis (a) and Shannon index (b). Each bar represents one sample.
